# Supplementary material for: Modifiable cardiovascular risk factors in adults aged 40–79 years in Germany with and without prior coronary heart disease or stroke
Source: Springer Nature journal article supplement (doi:10.1186/s12889-015-1929-5), 2015-07-23
Supplement: MOESM1 [file 9749680]

## Additional File 1

Table 1: Prevalence of Non-HDL above the target (95% confidence interval)

|             | No CHD or stroke (>3.8 mmol/l)<br>(N=4489) |                     | CHD or stroke (>2.6mmol/l)<br>(N=612) |                     |
|-------------|--------------------------------------------|---------------------|---------------------------------------|---------------------|
|             | 58.8 (56.6-61)                             |                     | 86.3 (82.3-89.5)                      |                     |
| Age         | Men<br>(N=2040)                            | Women<br>(N=2449)   | Men<br>(N=396)                        | Women<br>(N=216)    |
| Total       | 63<br>(60.1-65.9)                          | 54.9<br>(52.1-57.6) | 86.3<br>(81.9-89.8)                   | 86.3<br>(79.1-91.3) |
| 40-59 years | 62.5<br>(59-66)                            | 45.4<br>(42.2-48.7) | 85.6<br>(72.2-93.2)                   | 92.5<br>(66.7-98.7) |
| 60-79 years | 64.1<br>(59.9-68)                          | 70.6<br>(66.6-74.3) | 86.5<br>(81.9-90.1)                   | 85.2<br>(77.3-90.7) |

CHD: coronary heart disease, HDL: High density lipoprotein cholesterol

Table 2: Prevalence of cardiovascular risk factors (95% confidence interval) among men by age group

| Risk factor                   | 40-59 years         |                                 |                         |              | 60-79 years         |                                |                             |              |
|-------------------------------|---------------------|---------------------------------|-------------------------|--------------|---------------------|--------------------------------|-----------------------------|--------------|
|                               | Total<br>(N=1230)   | No CHD or<br>stroke<br>(N=1164) | CHD or<br>Stroke (N=66) | P            | Total<br>(N=1206)   | No CHD or<br>stroke<br>(N=876) | CHD or<br>Stroke<br>(N=330) | P            |
| Daily smoking                 | 28.4<br>(24.7-32.4) | 27.8<br>(23.9-32.0)             | 39.7<br>(24.8-56.7)     | 0.100        | 10.7<br>(8.8-13)    | 10.9<br>(8.8-13.5)             | 10.1<br>(6.2-16.1)          | 0.800        |
| <2.5h physical activity/week  | 21.3<br>(18.7-24.3) | 21.2<br>(18.5-24.3)             | 23.2<br>(14.1-35.9)     | 0.700        | 82.3<br>(79.1-85.1) | 81.4<br>(77.8-84.5)            | 84.4<br>(77.3-89.6)         | 0.400        |
| No day physically active/week | 28.2<br>(25.0-31.7) | 27.1<br>(23.9-30.6)             | 49<br>(35-63.1)         | <b>0.002</b> | 39.1<br>(35.1-43.3) | 35.6<br>(31-40.3)              | 47.9<br>(39.5-56.3)         | <b>0.014</b> |
| <2 portions fruit/day         | 74.3<br>(71.4-77)   | 74.9<br>(72-77.6)               | 60.6<br>(43.7-75.2)     | 0.100        | 65.7<br>(61.7-69.4) | 64.1<br>(59.5-68.5)            | 69.6<br>(62.4-75.9)         | 0.200        |
| <2 portions vegetables/day    | 94<br>(91.9-95.5)   | 94.1<br>(92-95.7)               | 91.2<br>(75.9-97.2)     | 0.500        | 93.7<br>(91.6-95.3) | 93.2<br>(91-94.9)              | 94.8<br>(88.6-97.7)         | 0.500        |
| <1 portions fish/week         | 65.6<br>(62.2-68.9) | 65.8<br>(62.3-69.1)             | 62.6<br>(47.6-75.6)     | 0.700        | 65.3<br>(61.8-68.7) | 62.7<br>(58.5-66.7)            | 72.1<br>(65.4-78)           | <b>0.019</b> |
| Alcohol intake > 20g          | 19.5                | 19.4                            | 20.9                    | 0.800        | 24.4                | 25.3                           | 22.2                        | 0.400        |

|                                                                                 |             |             |             |                  |             |             |             |                  |
|---------------------------------------------------------------------------------|-------------|-------------|-------------|------------------|-------------|-------------|-------------|------------------|
|                                                                                 | (16.8-22.5) | (16.7-22.5) | (10.7-36.7) |                  | (21.1-28)   | (21.6-29.3) | (16.2-29.6) |                  |
| Alcohol intake= 0g/day                                                          | 8.1         | 7.8         | 15.2        | 0.200            | 7.9         | 8.4         | 6.7         | 0.500            |
|                                                                                 | (6.1-10.7)  | (5.8-10.4)  | (5.4-35.8)  |                  | (6.2-10.1)  | (6.1-11.5)  | (4-11)      |                  |
| Overweight (BMI $\geq$ 25kg/m <sup>2</sup> )                                    | 73.9        | 73.4        | 83.3        | 0.100            | 83.5        | 82.2        | 86.7        | 0.100            |
|                                                                                 | (70.6-76.9) | (70.1-76.5) | (70.4-91.3) |                  | (80.7-85.9) | (78.9-85.1) | (81.2-90.7) |                  |
| Obesity (BMI $\geq$ 30kg/m <sup>2</sup> )                                       | 25.1        | 24.5        | 36          | 0.100            | 32.1        | 28.4        | 41.5        | <b>0.004</b>     |
|                                                                                 | (22-28.5)   | (21.4-28)   | (22.2-52.6) |                  | (28.3-36.4) | (24.4-32.6) | (33.5-49.9) |                  |
| BP $\geq$ 140/90mmHg                                                            | 21.5        | 21.7        | 18.1        | 0.500            | 26.4        | 28.4        | 21.7        | 0.100            |
|                                                                                 | (18.7-24.7) | (18.8-24.9) | (9.6-31.7)  |                  | (22.9-30.2) | (24.3-32.8) | (16.3-28.2) |                  |
| Proportion of unaware <sup>a</sup> among those with BP $\geq$ 140/90 mmHg       | 40.9        | 42.7        | -           | <b>0.004</b>     | 29.6        | 34.7        | 12.7        | <b>0.012</b>     |
|                                                                                 | (33.7-48.6) | (35.5-50.2) | -           |                  | (23.7-36.4) | (27.5-42.7) | (5.2-27.8)  |                  |
| Proportion treated and aware <sup>b</sup> among those with BP $\geq$ 140/90mmHg | 29.6        | 27.2        | 86.6        | <b>&lt;0.001</b> | 55          | 50.5        | 70.1        | <b>0.047</b>     |
|                                                                                 | (22.9-37.3) | (20.8-34.6) | (43.9-98.2) |                  | (48.5-61.4) | (43.2-57.9) | (52.5-83.2) |                  |
| Elevated total cholesterol (TC $\geq$ 5.0 mmol/l)                               | 66          | 67.2        | 43.3        | <b>0.002</b>     | 63.8        | 72.4        | 42.4        | <b>&lt;0.001</b> |
|                                                                                 | (62.1-69.8) | (63.2-71)   | (29-58.9)   |                  | (59.5-67.8) | (68.1-76.4) | (34.9-50.3) |                  |
| Highly elevated TC ( $\geq$ 6.2 mmol/l)                                         | 24.5        | 24.8        | 17.8        | 0.300            | 20.2        | 23.8        | 11.2        | <b>0.003</b>     |
|                                                                                 | (21.5-27.8) | (21.8-28.1) | (8.8-32.7)  |                  | (17.1-23.6) | (20.1-28)   | (6.7-18.1)  |                  |
| Proportion unaware <sup>a</sup> among those with TC $\geq$ 5.0 mmol/l           | 62.3        | 63.1        | 38.6        | 0.100            | 48.8        | 51.8        | 36          | <b>0.013</b>     |
|                                                                                 | (58.1-66.3) | (58.6-67.3) | (19-62.7)   |                  | (43.9-53.6) | (46.7-56.8) | 25.7-47.7   |                  |
| Proportion treated and aware <sup>b</sup> among those with TC $\geq$ 5.0 mmol/l | 5.3         | 4.9         | 16.4        | <b>0.014</b>     | 14.8        | 10.4        | 33.3        | <b>&lt;0.001</b> |
|                                                                                 | (3.7-7.4)   | (3.3-7.2)   | (6.5-35.6)  |                  | (11.8-18.4) | (7.9-13.7)  | (23.5-44.9) |                  |

P values less than 0.05 were considered statistical significant (bold).

BMI: body mass index, BP: blood pressure, CHD: coronary heart disease, TC: total cholesterol

<sup>a</sup> defined as reported diagnosis of hypertension or dyslipidaemia

<sup>b</sup> defined as reported diagnosis of hypertension or dyslipidaemia in combination with reported use of antihypertensive or lipid-lowering drugs, respectively

Table 3: Prevalence of cardiovascular risk factors (95% confidence interval) among women by age group

| Risk factor                   | 40-59 years    |                           |                      |              | 60-79 years    |                          |                       |              |
|-------------------------------|----------------|---------------------------|----------------------|--------------|----------------|--------------------------|-----------------------|--------------|
|                               | Total (N=1230) | No CHD or stroke (N=1164) | CHD or Stroke (N=66) | P            | Total (N=1206) | No CHD or stroke (N=876) | CHD or Stroke (N=330) | P            |
| Daily smoking                 | 24.5           | 23.9                      | 53.5                 | <b>0.004</b> | 8.8            | 8.6                      | 10                    | 0.600        |
|                               | (21.6-27.7)    | (21.1-27)                 | (31.1-74.6)          |              | (7-11.1)       | (6.6-11.1)               | (5.6-17.3)            |              |
| <2.5h physical activity/week  | 84.1           | 83.9                      | 97.4                 | <b>0.027</b> | 85.5           | 85.7                     | 84.4                  | 0.700        |
|                               | (81.8-86.2)    | (81.5-86)                 | (82.8-99.7)          |              | (82.2-88.3)    | (82.2-88.6)              | (75.8-90.4)           |              |
| No day physically active/week | 32.8           | 32.5                      | 46.6                 | 0.200        | 41.2           | 38.7                     | 54.1                  | <b>0.005</b> |

|                                                                          |             |             |             |       |             |             |             |                  |
|--------------------------------------------------------------------------|-------------|-------------|-------------|-------|-------------|-------------|-------------|------------------|
|                                                                          | (29.7-36.2) | (29.3-36)   | (24.7-69.8) |       | (37.3-45.3) | (34.5-43.1) | (44.2-63.6) |                  |
| <2 portions fruit/day                                                    | 65.6        | 65.4        | 72.8        | 0.400 | 55.4        | 52.8        | 68.1        | <b>0.002</b>     |
|                                                                          | (62.6-68.4) | (62.4-68.3) | (52.8-86.5) |       | (51.2-59.4) | (48.3-57.3) | (59.5-75.5) |                  |
| <2 portions vegetables/day                                               | 86.3        | 86.2        | 90.4        | 0.500 | 88.1        | 87.6        | 90.8        | 0.300            |
|                                                                          | (83.2-88.8) | (83.2-88.7) | (72.5-97.1) |       | (85.3-90.5) | (84.5-90.2) | (84.5-94.6) |                  |
| <1 portions fish/week                                                    | 70.6        | 70.4        | 81.1        | 0.200 | 66.9        | 65.8        | 72.7        | 0.100            |
|                                                                          | (67.2-73.7) | (66.9-73.6) | (62.2-91.8) |       | (63.2-70.4) | (61.8-69.5) | (63.6-80.2) |                  |
| Alcohol intake> 10g                                                      | 16.1        | 16          | 20.1        | 0.800 | 11.8        | 13.1        | 5.3         | <b>0.011</b>     |
|                                                                          | (13.9-18.6) | (13.8-18.5) | (4.2-59.1)  |       | (9.6-14.5)  | (10.5-16.2) | (2.6-10.5)  |                  |
| Alcohol intake= 0g/day                                                   | 15.2        | 15.1        | 21.7        | 0.400 | 20.8        | 19.3        | 28.1        | <b>0.045</b>     |
|                                                                          | (12.8-18)   | (12.6-17.9) | (9.2-43.1)  |       | (17.4-24.6) | (15.7-23.6) | (20.6-37)   |                  |
| Overweight (BMI≥25kg/m <sup>2</sup> )                                    | 53.1        | 52.8        | 68.0        | 0.200 | 75.6        | 73.4        | 86.4        | <b>0.001</b>     |
|                                                                          | (49.8-56.4) | (49.5-56.1) | (44.6-84.8) |       | (72.5-78.4) | (70-76.6)   | (79.8-91.1) |                  |
| Obesity (BMI≥30kg/m <sup>2</sup> )                                       | 22.7        | 22.6        | 27          | 0.600 | 37.6        | 34.9        | 51.6        | <b>0.001</b>     |
|                                                                          | (20-25.7)   | (19.9-25.6) | (12.3-49.4) |       | (34.2-41.2) | (31.2-38.7) | (42.8-60.3) |                  |
| BP≥140/90mmHg                                                            | 11.4        | 11.3        | 14.3        | 0.600 | 26.9        | 28.5        | 19.1        | <b>0.044</b>     |
|                                                                          | (9.5-13.6)  | (9.5-13.5)  | (4.6-36.8)  |       | (23.6-30.5) | (24.9-32.4) | (12.7-27.7) |                  |
| Proportion of unaware <sup>a</sup> among those with BP≥ 140/90 mmHg      | 42.7        | 43          | 33.4        | 0.700 | 22.9        | 24.2        | 13.3        | 0.200            |
|                                                                          | (33.4-52.6) | (33.5-53)   | (5.2-82.1)  |       | (17.7-29)   | (18.5-30.9) | (4.9-31.2)  |                  |
| Proportion treated and aware <sup>b</sup> among those with BP≥140/90mmHg | 29.5        | 30.3        | -           | 0.200 | 65.1        | 63.9        | 74.4        | 0.300            |
|                                                                          | (22.1-38.2) | (22.7-39.1) | -           |       | (58.9-70.9) | (57.2-70.1) | (54.1-87.8) |                  |
| Elevated total cholesterol (TC≥5.0 mmol/l)                               | 67.6        | 67.7        | 59.1        | 0.400 | 79.1        | 82.9        | 59.4        | <b>&lt;0.001</b> |
|                                                                          | (64.3-70.6) | (64.5-70.8) | (35.9-78.8) |       | (75.6-82.1) | (79.4-86)   | (50-68.2)   |                  |
| Highly elevated TC (≥6.2 mmol/l)                                         | 21.1        | 21          | 24.7        | 0.800 | 34.3        | 37.3        | 18.8        | <b>&lt;0.001</b> |
|                                                                          | (18.3-24)   | (18.3-23.9) | (7.7-56.5)  |       | (30.6-38.1) | (33.3-41.6) | (12.6-27.2) |                  |
| Proportion unaware <sup>a</sup> among those with TC≥5.0 mmol/l           | 66.6        | 66.9        | 50.1        | 0.300 | 46.9        | 49.2        | 30.1        | <b>0.004</b>     |
|                                                                          | (62.4-70.6) | (62.7-70.8) | (19.7-80.4) |       | (43-50.8)   | (45.1-53.3) | (20-42.7)   |                  |
| Proportion treated and aware <sup>b</sup> among those with TC≥5.0 mmol/l | 4.3         | 4.3         | 4.1         | 0.900 | 15.3        | 13.2        | 30.3        | <b>&lt;0.001</b> |
|                                                                          | (3-6.3)     | (3-6.3)     | (0.5-26)    |       | (12.6-18.5) | (10.5-16.5) | (21.3-41.2) |                  |

P values less than 0.05 were considered statistical significant (bold).

BMI: body mass index, BP: blood pressure, CHD: coronary heart disease, TC: total cholesterol

<sup>a</sup> defined as reported diagnosis of hypertension or dyslipidaemia

<sup>b</sup> defined as reported diagnosis of hypertension or dyslipidaemia in combination with reported use of antihypertensive or lipid-lowering drugs, respectively
