# Supplementary material for: Modifiable cardiovascular risk factors in adults aged 40–79 years in Germany with and without prior coronary heart disease or stroke
Source: Springer Nature journal article supplement (doi:10.1186/s12889-015-1929-5), 2015-07-23
Supplement: MOESM2 [file 9749680]

## Additional File 2

Table 1: Prevalence of cardiovascular risk factors (95% confidence interval) by obesity status

| Risk factor                                                | Non-obese (BMI < 30)<br>N=3,658 | Obese (BMI ≥ 30)<br>N=1,408 | P                |
|------------------------------------------------------------|---------------------------------|-----------------------------|------------------|
| Daily smoking                                              | 20.6 (18.7-22.8)                | 17.8 (15-21)                | 0.100            |
| < 2.5 h physical activity/week                             | 82.3 (80.6-83.9)                | 82.8 (80.1-85.1)            | 0.700            |
| Physically inactive (no physical activity in average week) | 39 (35.4-42.7)                  | 32.6 (30.4-34.9)            | <b>0.002</b>     |
| < 2 portions fruit/day                                     | 65.7 (63.7-67.6)                | 67.4 (64-70.5)              | 0.400            |
| < 2 portions vegetable/day                                 | 90.5 (89.1-91.7)                | 90.3 (87.8-92.3)            | 0.900            |
| < 1 portion fish/week                                      | 67.5 (65.4-69.5)                | 67.3 (63.9-70.5)            | 0.900            |
| Alcohol intake > 10g/day (women) or 20g/day (men)          | 19.5 (18-21)                    | 14.1 (11.4-17.3)            | <b>0.003</b>     |
| Alcohol intake = 0 g/day                                   | 10.7 (9.3-12.4)                 | 17.6 (14.7-21)              | <b>&lt;0.001</b> |
| BP ≥ 140/90 mmHg                                           | 17.9 (16.2-19.8)                | 27.3 (24-30.8)              | <b>&lt;0.001</b> |
| Elevated TC (≥ 5.0 mmol/l)                                 | 69.3 (66.7-71.8)                | 67.9 (64.2-71.4)            | 0.500            |

P values less than 0.05 were considered statistically significant (bold).

BMI: body mass index, BP: blood pressure, TC: total cholesterol

Table 2: Prevalence of cardiovascular risk factors (95% confidence interval) by blood pressure level

| Risk factor                                                | BP < 140/90mmHg<br>N=3,963 | BP ≥ 140/90mmHg<br>N=1,127 | P                |
|------------------------------------------------------------|----------------------------|----------------------------|------------------|
| Daily smoking                                              | 21.2 (19.2-23.3)           | 14.4 (11.8-17.3)           | <b>&lt;0.001</b> |
| < 2.5 h physical activity/week                             | 82.1 (80.6-83.6)           | 83.5 (80.2-86.3)           | 0.400            |
| Physically inactive (no physical activity in average week) | 39 (35.4-42.7)             | 32.6 (30.4-34.9)           | 0.700            |
| < 2 portions fruit/day                                     | 65.8 (63.6-67.8)           | 67.2 (63.7-70.6)           | 0.500            |
| < 2 portions vegetable/day                                 | 90.1 (88.6-91.4)           | 91.6 (89.2-93.5)           | 0.300            |
| < 1 portion fish/week                                      | 67.6 (65.8-69.5)           | 66.1 (62.2-69.9)           | 0.500            |
| Alcohol intake > 10g/day (women) or 20g/day (men)          | 16.8 (15.3-18.5)           | 22.2 (19.2-25.6)           | <b>0.002</b>     |
| Alcohol intake = 0 g/day                                   | 12.9 (11.3-14.7)           | 11.7 (9-15)                | 0.500            |
| Overweight (BMI ≥ 25 kg/m <sup>2</sup> )                   | 67 (65-68.9)               | 81.2 (78.1-83.9)           | <b>&lt;0.001</b> |
| Obesity (BMI ≥ 30 kg/m <sup>2</sup> )                      | 25.9 (24-27.9)             | 37.5 (33.7-41.5)           | <b>&lt;0.001</b> |
| Elevated TC (≥ 5.0 mmol/l)                                 | 67.3 (64.8-69.6)           | 74.4 (70.4-78.1)           | <b>0.001</b>     |

P values less than 0.05 were considered statistically significant (bold).

BMI: body mass index, BP: blood pressure, TC: total cholesterol

Table 3: Prevalence of cardiovascular risk factors (95% confidence interval) according by total cholesterol level

| <b>Risk factor</b>                                         | <b>TC &lt; 5.0 mmol/l<br/>N=1,500</b> | <b>TC ≥ 5.0 mmol/l<br/>N=3,552</b> | <b>P</b>     |
|------------------------------------------------------------|---------------------------------------|------------------------------------|--------------|
| Daily smoking                                              | 19.9 (17.2-22.9)                      | 19.7 (17.8-21.8)                   | 0.900        |
| < 2.5 h physical activity/week                             | 83.5 (81-85.5)                        | 82 (80.2-83.7)                     | 0.300        |
| Physically inactive (no physical activity in average week) | 36.2 (32.8-39.8)                      | 33.4 (31.2-35.7)                   | 0.100        |
| < 2 portions fruit/day                                     | 65.5 (62.4-68.4)                      | 66.4 (64.2-68.6)                   | 0.600        |
| < 2 portions vegetable/day                                 | 90.1 (88.1-91.9)                      | 90.5 (89-91.8)                     | 0.800        |
| < 1 portion fish/week                                      | 67.9 (64.4-71.1)                      | 67.1 (64.7-69.3)                   | 0.700        |
| Alcohol intake > 10g/day (women) or 20g/day (men)          | 16.5 (13.8-19.7)                      | 18.5 (17-20.2)                     | 0.200        |
| Alcohol intake = 0 g/day                                   | 12.7 (10.4-15.4)                      | 12.7 (11.2-14.4)                   | 0.900        |
| Overweight (BMI ≥ 25 kg/m <sup>2</sup> )                   | 67.8 (64.7-70.7)                      | 70.9 (68.9-72.8)                   | 0.100        |
| Obesity (BMI ≥ 30 kg/m <sup>2</sup> )                      | 29.2 (25.9-32.7)                      | 27.9 (25.9-30)                     | 0.500        |
| BP ≥ 140/90 mmHg                                           | 16.8 (14.3-19.8)                      | 22.3 (20.4-24.4)                   | <b>0.001</b> |

P values less than 0.05 were considered statistically significant (bold).

BMI: body mass index, BP: blood pressure, TC: total cholesterol
